# Supplementary material
Source: PubMed Central journal article supplement (PMC1276039)
Supplement: pnas_0500090102_5.pdf [file pnas_0500090102_5.pdf]

**Table 3. Synthetic Peptides Tested for Recognition by T Cells against DT Melanoma Antigens**

| RANK | ANTIGENS                 |                        |                        |                                         |                                           |                                           |                                         |                                           |
|------|--------------------------|------------------------|------------------------|-----------------------------------------|-------------------------------------------|-------------------------------------------|-----------------------------------------|-------------------------------------------|
|      | gp100/B7 <sup>(a)</sup>  | Tyr/A26 <sup>(a)</sup> | Tyr/B38 <sup>(b)</sup> | GPNMB <sup>mut./A3</sup> <sup>(a)</sup> | SNRP116 <sup>mut./A3</sup> <sup>(a)</sup> | RBAF600 <sup>mut./B7</sup> <sup>(a)</sup> | SIRT2 <sup>mut./A3</sup> <sup>(a)</sup> | SNRPD1 <sup>mut./B38</sup> <sup>(b)</sup> |
| 1    | LPSPACQLV                | DRESWPSVF              | HHAFVDSIF              | TLDWLLQTPK                              | ILDAVVAQK                                 | RPHVPESAF                                 | KIFSEVTLK                               | SHETVIEL                                  |
| 2    | AQRLCQPVL                | RTCQCSGNF              | LHHAFVDSI              | TLGWLLQTPK                              | KILDAVVAQK                                | GPHVPESAF                                 | KIFSEVTPK                               | SHETVTIEL                                 |
| 3    | QPVLPSPAC                | SVFYNRTCQ              | LHHAFVDSIF             | TLDWLLQTP                               | ILDAVVAQE                                 | RPHVPESAFA                                |                                         |                                           |
| 4    | GCQPPAQL                 | ESWPSVFYN              |                        | TLGWLLQTP                               | KILDAVVAQE                                | GPHVPESAFA                                |                                         |                                           |
| 5    | QPPAQLRCQ                | CTERRLLVR              |                        | LDWLLQTPK                               |                                           |                                           |                                         |                                           |
| 6    | PSPACQLVL                | GVDDRESWP              |                        | LGWLLQTPK                               |                                           |                                           |                                         |                                           |
| 7    | SPGCQPPAQ                | DDRESWPSV              |                        | HTLDWLLQTP                              |                                           |                                           |                                         |                                           |
| 8    | VLPSPACQL                | QCQSGNFMGF             |                        |                                         |                                           |                                           |                                         |                                           |
| 9    | SPACQLVLH                | CQCQSGNFMGF            |                        |                                         |                                           |                                           |                                         |                                           |
| 10   | KGGSGTYCL                | GFNCGNCKF              |                        |                                         |                                           |                                           |                                         |                                           |
| 11   | GTYCLNVSL                | FTGVDDRES              |                        |                                         |                                           |                                           |                                         |                                           |
| 12   | VSLADTNSL                | CQCQSGNFMGF            |                        |                                         |                                           |                                           |                                         |                                           |
| 13   | SLAVVSTQL                | CSGNFMGFN              |                        |                                         |                                           |                                           |                                         |                                           |
| 14   | SSPGCQPPA <sup>(c)</sup> | CSGNFMGFNC             |                        |                                         |                                           |                                           |                                         |                                           |
| 15   | CQLVLHQIL                |                        |                        |                                         |                                           |                                           |                                         |                                           |
| 16   | AVVSTQLIM                |                        |                        |                                         |                                           |                                           |                                         |                                           |
| 17   | ISSPGCQPP                |                        |                        |                                         |                                           |                                           |                                         |                                           |
| 18   | SSPGCQPPAQ               |                        |                        |                                         |                                           |                                           |                                         |                                           |
| 19   | PGCQPPAQR                |                        |                        |                                         |                                           |                                           |                                         |                                           |

Peptides encoded by positive cDNA fragments (for gp100, Tyr/A26 and Tyr/B38) or from the protein regions around mutated residues were ranked according to public peptide prediction algorithms [(a) SYFPEITHI (<http://www.syfpeithi.de/>), (b) BIMAS ([http://thr.cit.nih.gov/molbio/hla\\_bind/](http://thr.cit.nih.gov/molbio/hla_bind/))] and then synthesized and tested for T cell recognition.

white : peptides not recognized at concentrations up to 100  $\mu$ M;

red : peptides recognized at concentrations below 100 nM; (c) peptide induced half-maximal lysis by independently generated CTL clones against gp100/B7 at concentrations of 0.1 to 1.0  $\mu$ M only (see **Table 1** and online supplemental **Fig. 8**);

green : overlapping peptides recognized at higher concentrations than optimum peptides;

red characters indicate mutated residues.
