# Supplementary material
Source: PubMed Central journal article supplement (PMC1276039)

no. lymphocytes( $\times 10^6$ )

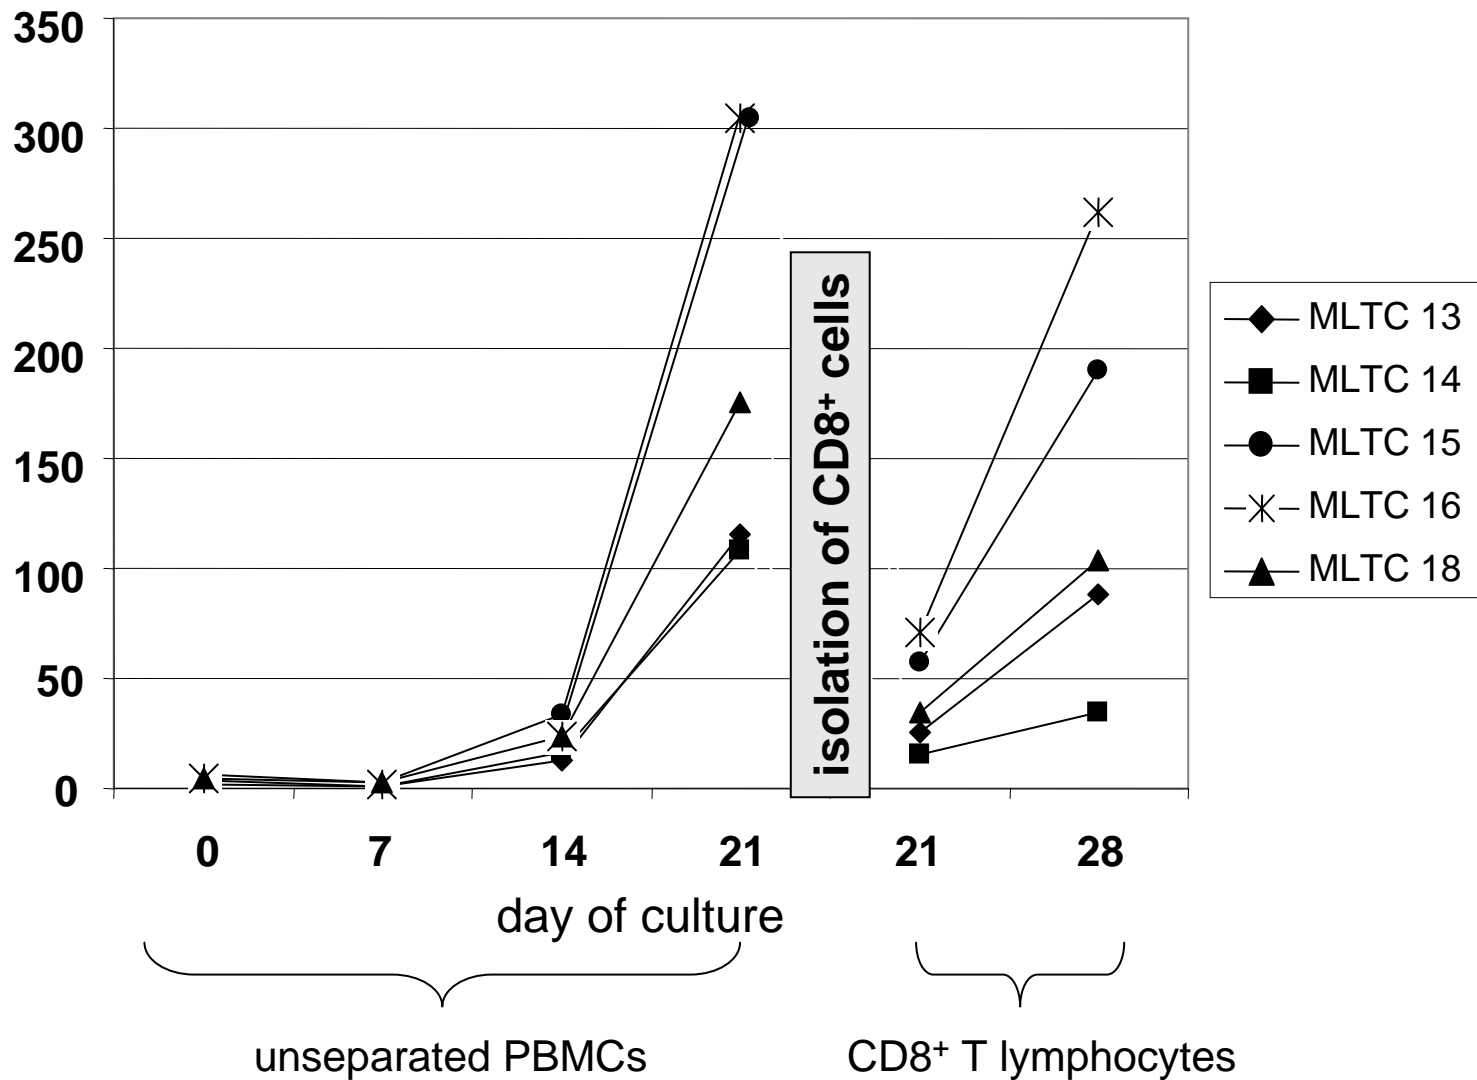

Supplement: pnas_0500090102_1.pdf [file pnas_0500090102_1.pdf]

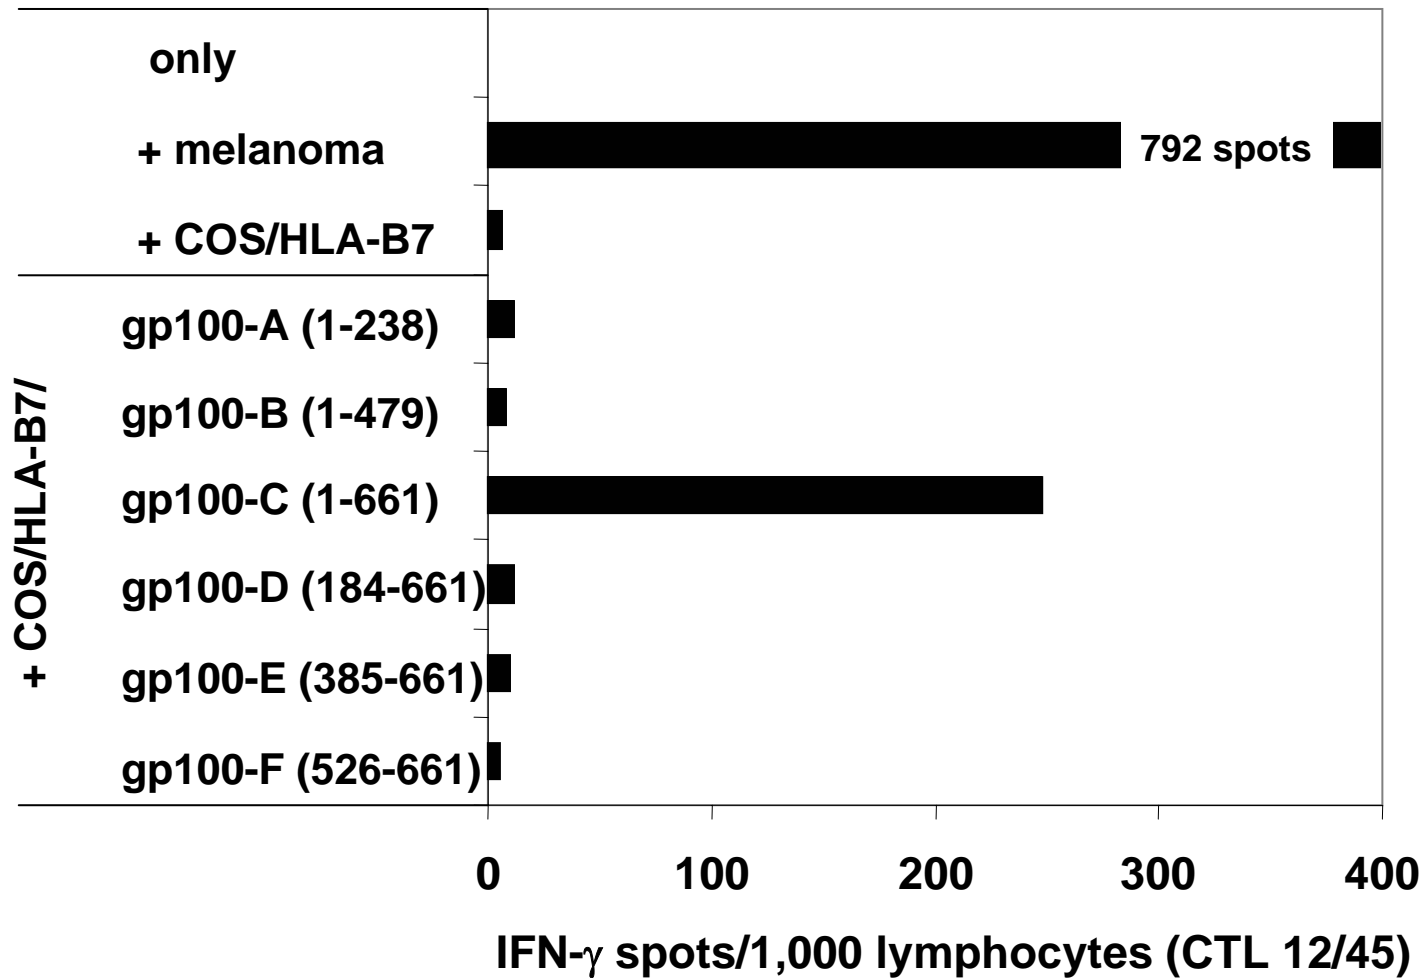

Supplement: pnas_0500090102_2.pdf [file pnas_0500090102_2.pdf]

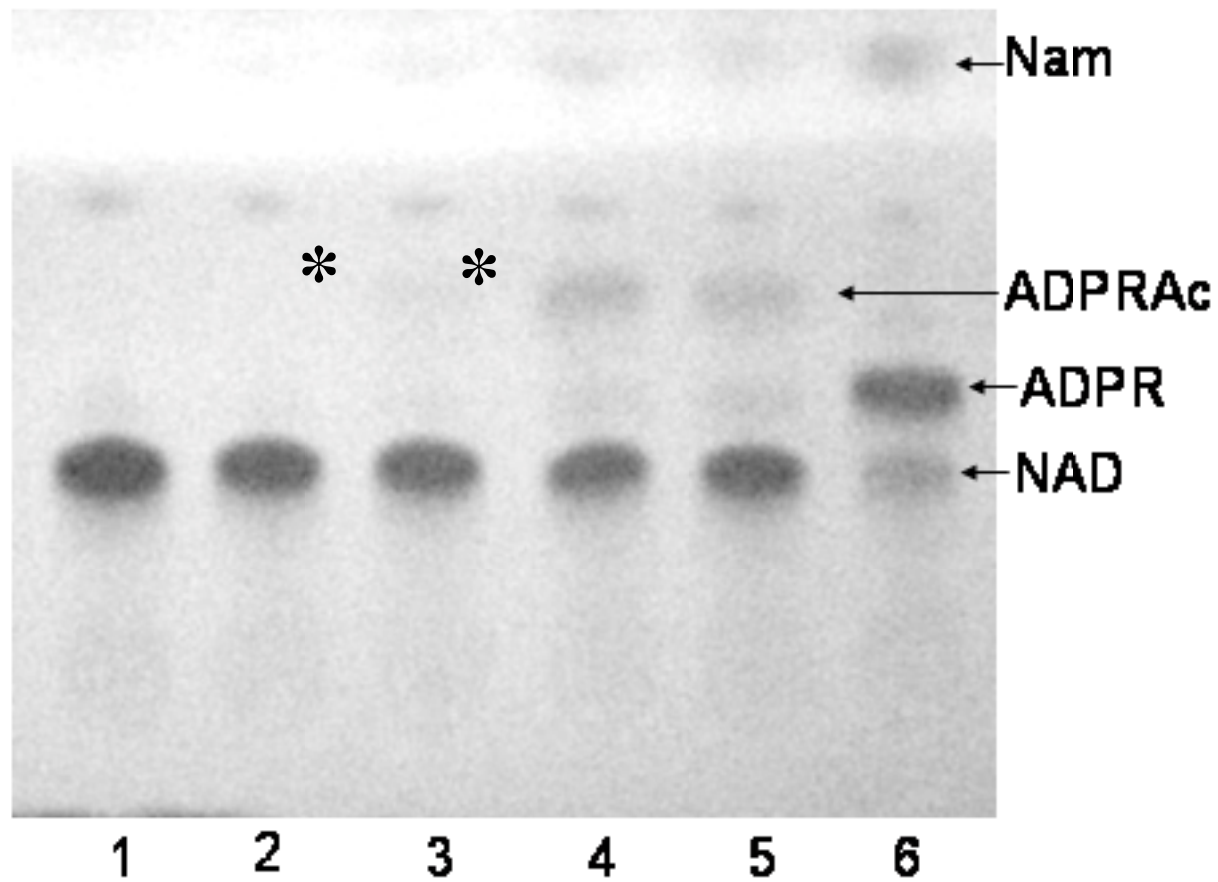

Supplement: pnas_0500090102_3.pdf [file pnas_0500090102_3.pdf]

# SK29 MLTC 16 (1981)

IFN- $\gamma$  spots / 10,000 CD8<sup>+</sup> T lymphocytes

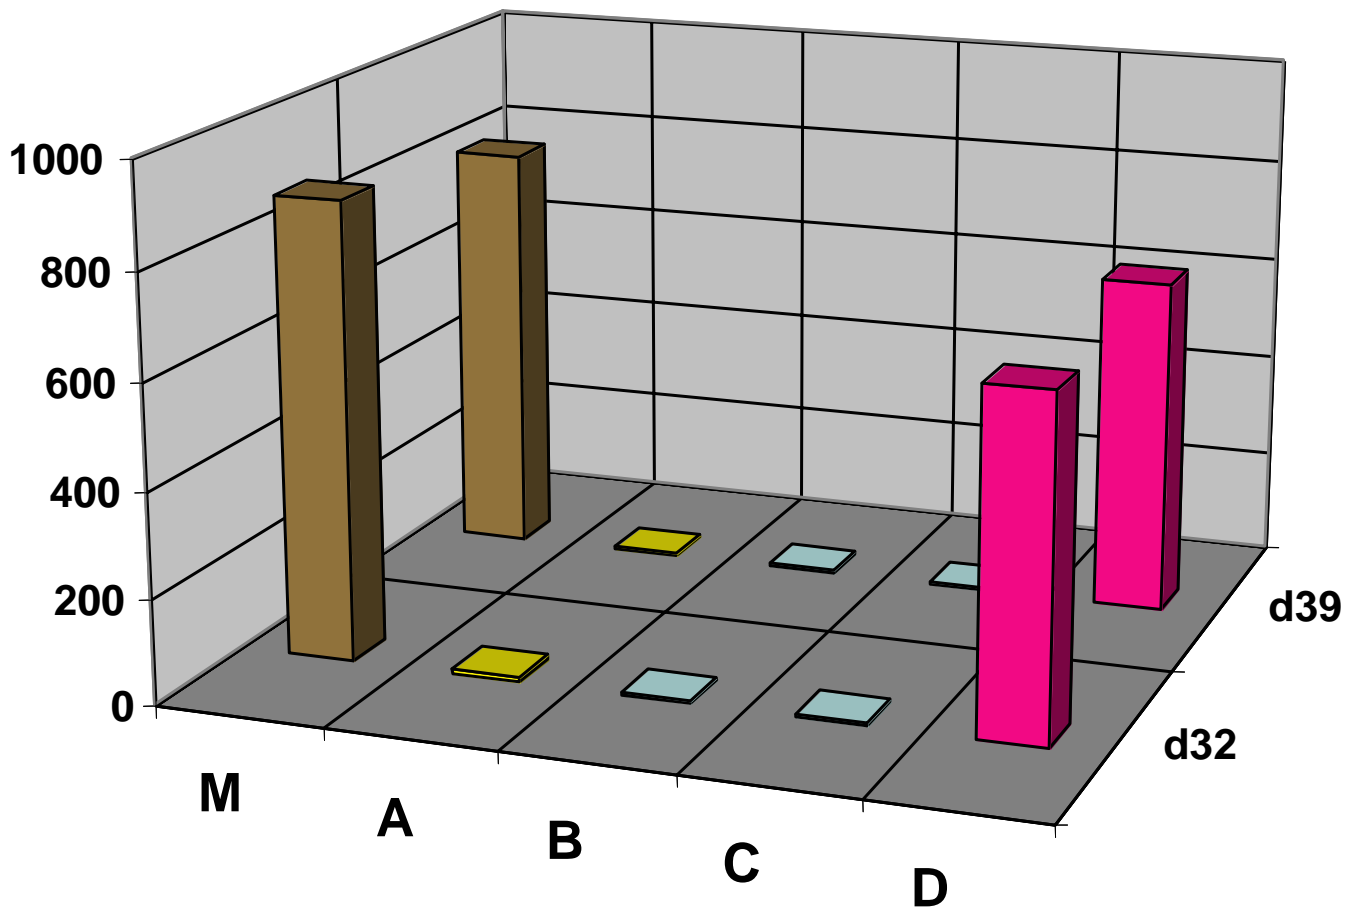

Supplement: pnas_0500090102_4.pdf [file pnas_0500090102_4.pdf]
